# Supplementary material for: 6-Shogaol from Dried Ginger Inhibits Growth of Prostate Cancer Cells Both In Vitro and In Vivo through Inhibition of STAT3 and NF-κB Signaling
Source: Oxford University Press journal article supplement (doi:10.1158/1940-6207.capr-13-0420), 2014-04-02
Supplement: 19406207capr130420-sup-fig_4.pdf [file 19406207capr130420-sup-fig_4.pdf]

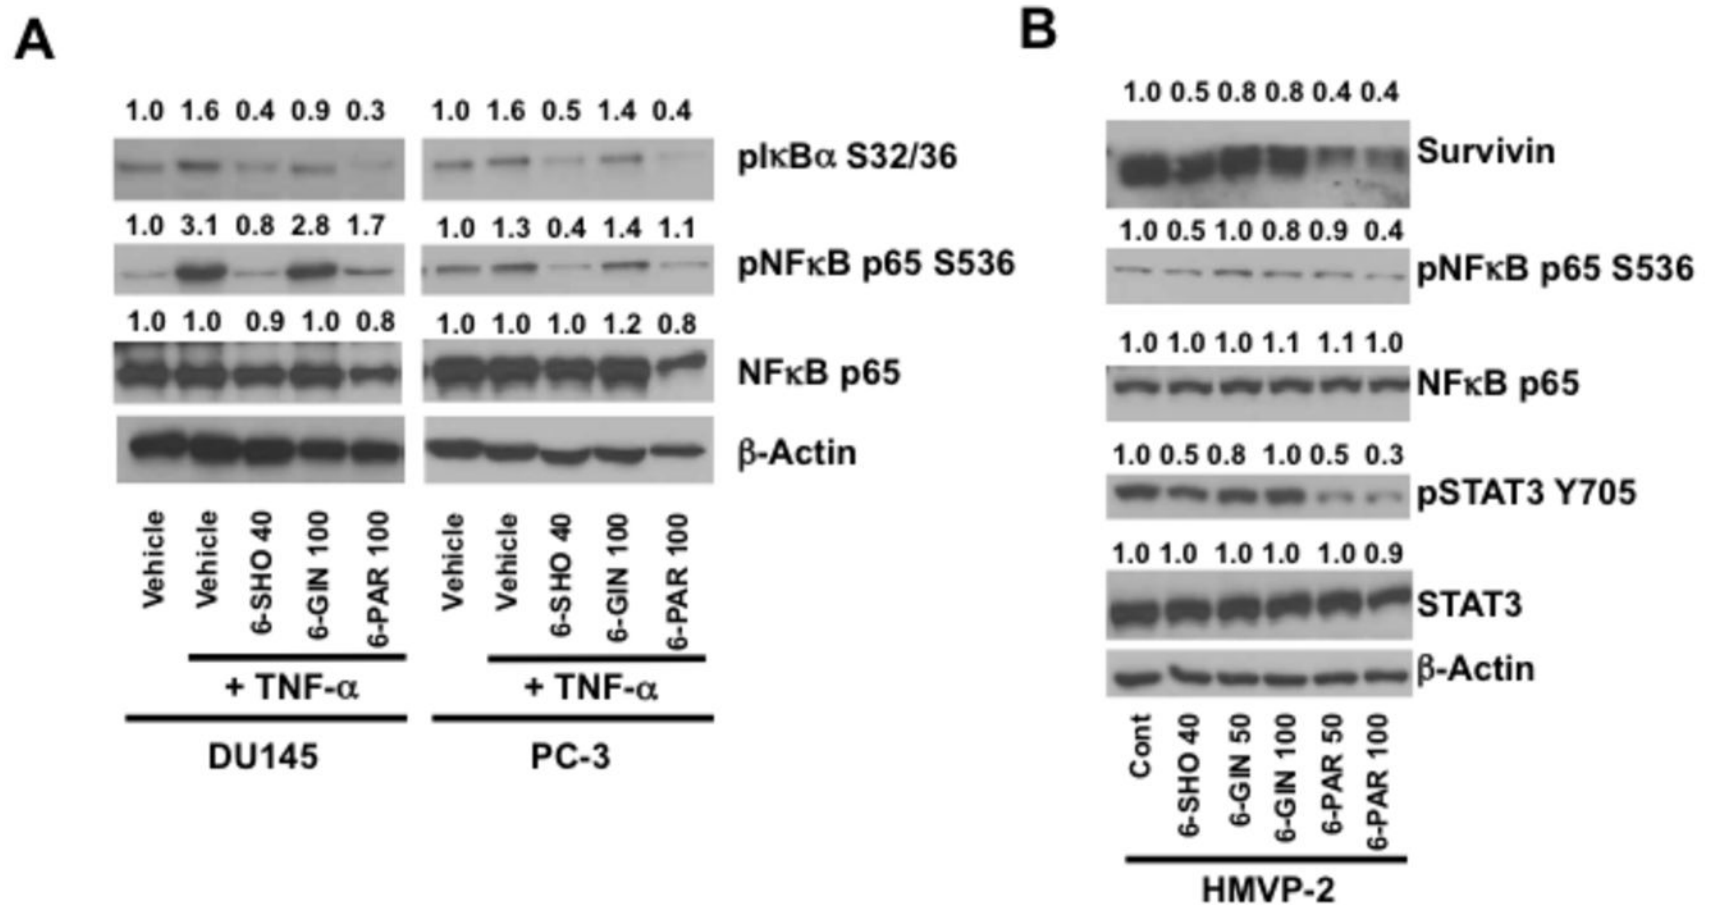

**Supplemental Figure 4.** Effects of ginger components, 6-GIN and 6-PAR, on human and mouse PCa cells. DU145 and PC-3 cells were treated with 6-PAR, 6-GIN or 6-SHO followed by TNF- $\alpha$  and the levels of phospho I $\kappa$ B $\alpha$ , phospho NF- $\kappa$ Bp65 and NF- $\kappa$ Bp65 were measured by Western blot. B, HMVP2 cells were treated with the indicated concentrations of 6-PAR, 6-GIN or 6-SHO and the levels of phospho STAT3<sup>Tyr705</sup>, STAT3, phospho NF- $\kappa$ Bp65, NF- $\kappa$ Bp65 and survivin were measured by Western blot. Changes in relative band intensities (normalized to  $\beta$ -actin and total protein) for Western blot data are given at the top of each column. The results are significant ( $P < 0.05$ ) where a decrease in phosphorylation or protein level is  $\geq 40\%$ .
